# Supplementary material for: Prognostic accuracy of MALDI-TOF mass spectrometric analysis of plasma in COVID-19
Source: Life Sci Alliance. 2021 Jun 24;4(8):e202000946. doi: 10.26508/lsa.202000946 (PMC8321665; doi:10.26508/lsa.202000946)
Supplement: Supplementary file 2 [file LSA-2020-00946_TableS2.xlsx]

## Sheet: Supplementary Table 2
Supplementary Table 2: mass peaks (m/z) selected in the data preprocess step using Wilcoxon test and FSelector package.
		Fselector package
Normality + Wilcoxon test + FDR correction		Ig filtering						Ig filtered peaks for PCA
Relevant peaks		Fold-1	Fold-2	Fold-3	Fold-4			2432
2432		2432	2432	2432	2432			2471
2471		2662	2471	2471	2471			2662
2662		2676	2770	2662	2676			2676
2676		2770	2792	2792	2792			2770
2770		2792	2955	2955	3161			2792
2792		2955	3161	3161	3218			2955
2955		3161	3218	3265	3265			3161
3046		3265	3265	3373	3373			3218
3142		3342	3373	3430	3491			3265
3161		3491	3430	3491	3608			3373
3218		3608	3491	3608	3825			3430
3265		3825	3608	3740	3843			3491
3342		3843	3843	3825	3900			3608
3373		3900	3900	3843	4073			3825
3430		4284	4073	3900	4284			3843
3491		4302	4302	4284	4302			3900
3608		4384	4384	4302	4384			4073
3740		4419	4404	4384	4419			4284
3825		4627	4419	4419	4627			4302
3843		4939	4627	4627	4939			4384
3900		5574	4939	4939	5574			4419
4073		5737	5574	5574	5737			4627
4284		5764	5737	5737	5764			4939
4302		5853	5764	5764	5853			5574
4384		5905	5853	5853	5905			5737
4404		6958	5905	5905	6647			5764
4419		8565	6647	6589	6958			5853
4459		8602	6958	6958	8565			5905
4469		8766	8565	8565	8602			6647
4627		8915	8602	8602	8766			6958
4939		8949	8766	8766	8915			8565
5024		11076	8915	8915	8949			8602
5574		11681	8949	8949	11076			8766
5737			11076	11076	11681			8915
5764			11681	11681				8949
5853								11076
5905								11681
6589
6647
6776
6958
8142
8565
8602
8766
8915
8949
11076
11681
