# Supplementary material for: Prognostic accuracy of MALDI-TOF mass spectrometric analysis of plasma in COVID-19
Source: Life Sci Alliance. 2021 Jun 24;4(8):e202000946. doi: 10.26508/lsa.202000946 (PMC8321665; doi:10.26508/lsa.202000946)
Supplement: Supplementary file 3 [file LSA-2020-00946_TableS3.xlsx]

## Sheet: Supplementary Table 3
Supplementary Table 3. hyperparameters parameters for each machine learning algorithm in the 4-fold Cross Validation
	Method	Hyperparameters	Best values
			None	Ig
Fold 1	SVM-P	degree	3	2
		scale	0.0432726	0.1170655
		C	192.6102	1.584942
	SVM-R	sigma	0.002738886	0.04912875
		C	0.04218571	0.04357761
	KNN	k	27	15
	NNET	size	14	19
		decay	0.001281219	0.0001297285
	NB	fL	0	0
		usekernel	TRUE	TRUE
		adjust	1	1
	RF	mtry	10	4
Fold 2	SVM-P	degree	2	2
		scale	0.04434088	0.001703176
		C	0.5911297	0.06693297
	SVM-R	sigma	0.05345243	0.02883537
		C	0.2835634	0.1672825
	KNN	k	11	13
	NNET	size	6	7
		decay	0.1095077	0.1928048
	NB	fL	0	0
		usekernel	TRUE	TRUE
		adjust	1	1
	RF	mtry	3	1
Fold 3	SVM-P	degree	2	2
		scale	0.7946799	0.06457793
		C	4.268268	0.8873328
	SVM-R	sigma	0.0130423	0.02228389
		C	245.3322	1.939417
	KNN	k	29	15
	NNET	size	15	1
		decay	0.0001879133	0.0006459702
	NB	fL	0	0
		usekernel	FALSE	FALSE
		adjust	1	1
	RF	mtry	5	8
Fold 4	SVM-P	degree	1	1
		scale	0.3706227	0.01321086
		C	0.1394856	65.68894
	SVM-R	sigma	0.009755128	0.00652144
		C	1.592161	21.76437
	KNN	k	3	3
	NNET	size	19	2
		decay	0.0002218227	0.0001491988
	NB	fL	0	0
		usekernel	TRUE	TRUE
		adjust	1	1
	RF	mtry	4	5
