# Supplementary material for: Prognostic accuracy of MALDI-TOF mass spectrometric analysis of plasma in COVID-19
Source: Life Sci Alliance. 2021 Jun 24;4(8):e202000946. doi: 10.26508/lsa.202000946 (PMC8321665; doi:10.26508/lsa.202000946)
Supplement: Supplementary file 6 [file LSA-2020-00946_TableS6.xlsx]

## Sheet: Supplementary Table 6
Supplementary Table 6: Total proteins identified in the 10-15kDa region of C18 fractionated plasma collected from patients with high and low risk.
Checked	Protein FDR Confidence: Combined	Master	Accession	Description	Exp. q-value: Combined	Marked as	Sum PEP Score	Coverage [%]	# Peptides	# Isoforms	# PSMs	# Unique Peptides	# AAs	MW [kDa]	calc. pI	Score Sequest HT: Sequest HT	# Peptides (by Search Engine): Sequest HT	# Razor Peptides	Abundance Ratio: (High-Risk) / (Low-Risk)	Abundance Ratio Variability [%]: (High-Risk) / (Low-Risk)	Abundances (Grouped): High-Risk	Abundances (Grouped): Low-Risk	Abundances (Grouped) CV [%]: High-Risk	Abundances (Grouped) CV [%]: Low-Risk	Found in Sample: [S1] F1: Sample, High-Risk	Found in Sample: [S5] F5: Sample, High-Risk	Found in Sample: [S6] F6: Sample, High-Risk	Found in Sample: [S2] F2: Sample, Low-Risk	Found in Sample: [S3] F3: Sample, Low-Risk	Found in Sample: [S4] F4: Sample, Low-Risk	# Protein Groups	Modifications
0	High	Master Protein	P05109	Protein S100-A8 OS=Homo sapiens OX=9606 GN=S100A8 PE=1 SV=1	0		9.293	24	2	2	36	2	93	10.8	7.03	89.59	2	0	1.005	51.62	115508	119018	25.58	15.91	High	High	High	High	High	High	1
0	High	Master Protein	P02776	Platelet factor 4 OS=Homo sapiens OX=9606 GN=PF4 PE=1 SV=2	0		25.504	44	5	5	51	5	101	10.8	8.62	162.39	5	0	3.339	125.3	154380	33830.1	20.38	142.33	High	High	High	High	Peak Found	Peak Found	1
0	High	Master Protein	P02656	Apolipoprotein C-III OS=Homo sapiens OX=9606 GN=APOC3 PE=1 SV=1	0		67.006	47	4	7	224	4	99	10.8	5.41	840.72	4	0	0.778	64.71	1.50639e+06	1.90871e+06	39.52	14.73	High	High	High	High	High	High	1
0	High	Master Protein	P02652	Apolipoprotein A-II OS=Homo sapiens OX=9606 GN=APOA2 PE=1 SV=1	0		16.517	21	3	3	89	3	100	11.2	6.62	268.1	3	0	0.643	36.47	1.5065e+06	2.81184e+06	12.34	25.01	High	High	High	High	High	High	1
0	High	Master Protein	P81605	Dermcidin OS=Homo sapiens OX=9606 GN=DCD PE=1 SV=2	0		18.697	23	3	3	72	3	110	11.3	6.54	227.04	3	0	0.714	83.41	279844	432724	52.77	17.07	High	High	High	High	High	High	1
0	High	Master Protein	P02655	Apolipoprotein C-II OS=Homo sapiens OX=9606 GN=APOC2 PE=1 SV=1	0		25.746	30	2	3	73	2	101	11.3	4.72	201.86	2	0	0.622	50.51	147383	261937	33.14	16.59	High	High	High	High	High	High	1
0	High	Master Protein	P0DOY2	Immunoglobulin lambda constant 2 OS=Homo sapiens OX=9606 GN=IGLC2 PE=1 SV=1	0		53.184	60	6	6	445	2	106	11.3	7.24	1472.32	6	0	1.865	63.52	6.29808e+06	3.38368e+06	12.96	32.62	High	High	High	High	High	High	1
0	High	Master Protein	P62805	Histone H4 OS=Homo sapiens OX=9606 GN=H4C1 PE=1 SV=2	0		7.274	17	2	2	16	2	103	11.4	11.36	42.73	2	0	0.622	30.61	37874.1	58623.2	16.39	5.29	High	High	High	High	High	High	1
0	High	Master Protein	Q9HCY8	Protein S100-A14 OS=Homo sapiens OX=9606 GN=S100A14 PE=1 SV=1	0		7.419	14	1	1	7	1	104	11.7	5.24	21.67	1	0	0.505	70.94	6809.64	13475.5	68.75	40.14	Peak Found	High	Peak Found	High	Peak Found	High	1
0	High	Master Protein	P01834	Immunoglobulin kappa constant OS=Homo sapiens OX=9606 GN=IGKC PE=1 SV=2	0		129.43	86	13	13	876	1	107	11.8	6.52	3056.32	13	0	1.538	75.58	158927	134106	41.71	65.23	High	High	High	High	High	Peak Found	1
0	High	Master Protein	P01714	Immunoglobulin lambda variable 3-19 OS=Homo sapiens OX=9606 GN=IGLV3-19 PE=1 SV=2	0		16.406	24	2	2	35	2	112	12	4.96	119.37	2	0	1.383	20.28	199948	159643	9.46	8.94	High	High	High	High	High	High	1
0	High	Master Protein	P01700	Immunoglobulin lambda variable 1-47 OS=Homo sapiens OX=9606 GN=IGLV1-47 PE=1 SV=2	0		7.987	21	2	2	11	2	117	12.3	5.91	31.84	2	0	1.958	27.33	176210	88184.1	19.79	20.92	High	High	High	Peak Found	Peak Found	High	1
0	High	Master Protein	A0A0A0MT36	Immunoglobulin kappa variable 6D-21 OS=Homo sapiens OX=9606 GN=IGKV6D-21 PE=3 SV=1	0		9.164	25	3	3	8	3	114	12.3	7.28	21.94	3	0	1.381	22.35	83283.9	52796.2	12.62	19.7	High	High	High	High	Peak Found	Peak Found	1
0	High	Master Protein	A0A075B6K4	Immunoglobulin lambda variable 3-10 OS=Homo sapiens OX=9606 GN=IGLV3-10 PE=3 SV=2	0		13.447	23	3	3	35	2	115	12.4	4.83	101.79	3	0	1.143	22.63	72716.7	66775.7	19.8	9.12	High	High	High	High	High	High	1
0	High	Master Protein	P80748	Immunoglobulin lambda variable 3-21 OS=Homo sapiens OX=9606 GN=IGLV3-21 PE=1 SV=2	0		25.839	45	5	5	76	4	117	12.4	5.29	246.88	5	1	1.339	24.09	443982	294677	20.42	9.34	High	High	High	High	High	High	1
0	High	Master Protein	P01624	Immunoglobulin kappa variable 3-15 OS=Homo sapiens OX=9606 GN=IGKV3-15 PE=1 SV=2	0		26.953	42	3	4	93	3	115	12.5	5.19	292.1	3	0	1.513	31.4	692826	440400	19.98	6.3	High	High	High	High	High	High	1
0	High	Master Protein	P01619	Immunoglobulin kappa variable 3-20 OS=Homo sapiens OX=9606 GN=IGKV3-20 PE=1 SV=2	0		39.891	56	5	5	178	5	116	12.5	4.96	594.53	5	0	1.248	26.07	1.25469e+06	1.21291e+06	12.17	13.93	High	High	High	High	High	High	1
0	High	Master Protein	A0A0B4J2D9	Immunoglobulin kappa variable 1D-13 OS=Homo sapiens OX=9606 GN=IGKV1D-13 PE=3 SV=1	0		9.261	25	2	2	22	1	117	12.6	7.84	63.89	2	0	1.162	28.88	19341.2	15820.6	30.63	39.18	High	High	Peak Found	Peak Found	Peak Found	Peak Found	1
0	High	Master Protein	P04430	Immunoglobulin kappa variable 1-16 OS=Homo sapiens OX=9606 GN=IGKV1-16 PE=1 SV=2	0		43.172	34	4	5	115	2	117	12.6	8.16	467.04	4	2	1.198	53.08	700759	429456	14.47	46.59	High	Peak Found	High	High	High	Peak Found	1
0	High	Master Protein	A0A0A0MRZ8	Immunoglobulin kappa variable 3D-11 OS=Homo sapiens OX=9606 GN=IGKV3D-11 PE=3 SV=6	0		23.315	42	3	3	90	3	115	12.6	5.29	298.09	3	0	1.584	38.15	725355	486631	29.13	4.63	High	High	High	High	High	High	1
0	High	Master Protein	A0A0C4DH73	Immunoglobulin kappa variable 1-12 OS=Homo sapiens OX=9606 GN=IGKV1-12 PE=3 SV=1	0		25.37	29	3	4	70	1	117	12.6	8.31	221.96	3	0	1.666	47.28	75225.3	44432.6	11.28	46.82	High	High	High	High	High	High	1
0	High	Master Protein	P01742	Immunoglobulin heavy variable 1-69 OS=Homo sapiens OX=9606 GN=IGHV1-69 PE=1 SV=2	0		8.018	17	2	2	32	1	117	12.7	9.17	110.11	2	0	1.467	30.58	199888	120669	16.19	28.21	High	High	High	High	High	High	1
0	High	Master Protein	P0DSN7	Probable non-functional immunoglobulinn kappa variable 1D-37 OS=Homo sapiens OX=9606 GN=IGKV1D-37 PE=5 SV=1	0		8.831	15	1	1	20	1	117	12.7	9.25	71.48	1	0	1.559	30.38	29250	18762.8	19.13	36.51	High	High	High	High	High	High	1
0	High	Master Protein	A0A0C4DH72	Immunoglobulin kappa variable 1-6 OS=Homo sapiens OX=9606 GN=IGKV1-6 PE=3 SV=1	0		22.468	29	4	4	52	1	117	12.7	8.29	151.16	4	3	1.457	21.68	145632	107109	10.36	9.35	High	High	High	High	High	High	1
0	High	Master Protein	A0A0C4DH42	Immunoglobulin heavy variable 3-66 OS=Homo sapiens OX=9606 GN=IGHV3-66 PE=3 SV=1	0		33.727	39	5	6	117	2	116	12.7	8.16	388.16	5	2	1.565	28.74	623913	395509	24.85	2.97	High	High	High	High	High	High	1
0	High	Master Protein	A0A0C4DH69	Immunoglobulin kappa variable 1-9 OS=Homo sapiens OX=9606 GN=IGKV1-9 PE=3 SV=1	0		12.83	29	3	3	10	3	117	12.7	8.29	27.8	3	0	1.43	42.07	78713.5	53713.6	15.21	13.27	High	High	High	Peak Found	High	Peak Found	1
0	High	Master Protein	A0A0J9YXX1	Immunoglobulin heavy variable 5-10-1 OS=Homo sapiens OX=9606 GN=IGHV5-10-1 PE=3 SV=1	0		14.437	31	4	4	37	3	117	12.8	8.28	131.9	4	1	1.603	35.81	435379	263395	17.44	25.92	High	High	High	High	High	High	1
0	High	Master Protein	A0A075B6H9	Immunoglobulin lambda variable 4-69 OS=Homo sapiens OX=9606 GN=IGLV4-69 PE=1 SV=1	0.004		3.51	8	1	1	7	1	119	12.8	6.51	17.16	1	0	2.322	42.38	30494.1	12488.1	24.81	47.59	High	High	High	Peak Found	Peak Found	High	1
0	High	Master Protein	A0A0C4DH35	Probable non-functional immunoglobulin heavy variable 3-35 OS=Homo sapiens OX=9606 GN=IGHV3-35 PE=5 SV=1	0		34.607	26	3	3	126	1	117	12.8	7.88	487.92	3	0	1.394	39.05	51563.3	31360.4	25.31	32.22	High	High	High	High	Peak Found	High	1
0	High	Master Protein	A0A0C4DH31	Immunoglobulin heavy variable 1-18 OS=Homo sapiens OX=9606 GN=IGHV1-18 PE=3 SV=1	0		12.262	32	3	3	7	1	117	12.8	8.84	22.05	3	0	1.183	17.32	10853	8924.24	7.65	26	High	High	High	High	Peak Found	High	1
0	High	Master Protein	A0A0J9YX35	Immunoglobulin heavy variable 3-64D OS=Homo sapiens OX=9606 GN=IGHV3-64D PE=3 SV=1	0		41.677	35	5	5	150	3	117	12.8	7.85	545.78	5	2	1.41	37.05	1.64858e+06	950563	21.35	27.13	High	High	High	High	High	High	1
0	High	Master Protein	A0A0B4J1V1	Immunoglobulin heavy variable 3-21 OS=Homo sapiens OX=9606 GN=IGHV3-21 PE=1 SV=1	0		22.753	35	3	4	86	1	117	12.8	8.28	260.26	3	0	1.702	64.98	270796	160520	43.15	54.91	High	High	High	High	High	High	1
0	High	Master Protein	P01593	Immunoglobulin kappa variable 1D-33 OS=Homo sapiens OX=9606 GN=IGKV1D-33 PE=1 SV=2	0		43.021	29	3	4	129	1	117	12.8	4.78	514.21	3	0	1.125	16.6	40198.8	37952.5	11.99	15.45	High	High	High	High	High	High	1
0	High	Master Protein	A0A0B4J1V6	Immunoglobulin heavy variable 3-73 OS=Homo sapiens OX=9606 GN=IGHV3-73 PE=3 SV=1	0		9.843	25	2	2	15	1	119	12.8	9.17	43.93	2	0	1.661	19.91	25083	13355.1	21.12	7.45	High	High	High	High	High	High	1
0	High	Master Protein	A0A075B6Q5	Immunoglobulin heavy variable 3-64 OS=Homo sapiens OX=9606 GN=IGHV3-64 PE=3 SV=1	0		4.014	16	1	1	8	1	118	12.9	7.85	21.65	1	0	1.379	35.87	23758	17229.7	32.58	11.38	High	High	High	High	High	Peak Found	1
0	High	Master Protein	P01780	Immunoglobulin heavy variable 3-7 OS=Homo sapiens OX=9606 GN=IGHV3-7 PE=1 SV=2	0		47.225	43	5	6	183	1	117	12.9	6.57	675.72	5	2	1.597	44.51	253699	159971	23.63	24.47	High	High	High	High	High	High	1
0	High	Master Protein	P01782	Immunoglobulin heavy variable 3-9 OS=Homo sapiens OX=9606 GN=IGHV3-9 PE=1 SV=2	0		27.239	32	4	5	90	1	118	12.9	7.08	287.48	4	0	1.929	29.97	122430	52794.5	20.3	17.87	High	High	High	Peak Found	Peak Found	High	1
0	High	Master Protein	P01768	Immunoglobulin heavy variable 3-30 OS=Homo sapiens OX=9606 GN=IGHV3-30 PE=1 SV=2	0		22.458	33	4	5	58	2	117	12.9	8.92	199.42	4	0	1.666	39.85	362837	188188	21.41	39.61	High	High	High	High	High	High	1
0	High	Master Protein	A0A075B6P5	Immunoglobulin kappa variable 2-28 OS=Homo sapiens OX=9606 GN=IGKV2-28 PE=3 SV=1	0		33.264	37	3	4	74	1	120	12.9	5.94	246.84	3	0	1.761	12.81	207372	109885	5.34	7.89	High	High	High	High	High	High	1
0	High	Master Protein	A0A0A0MS15	Immunoglobulin heavy variable 3-49 OS=Homo sapiens OX=9606 GN=IGHV3-49 PE=3 SV=1	0		20.18	30	4	4	44	1	119	13	8.62	151.79	4	3	1.339	35.44	247146	177055	19.36	12.72	Peak Found	Not Found	High	Not Found	Not Found	Not Found	1
0	High	Master Protein	A0A0C4DH68	Immunoglobulin kappa variable 2-24 OS=Homo sapiens OX=9606 GN=IGKV2-24 PE=3 SV=1	0		9.784	31	2	2	16	2	120	13.1	8.53	47.77	2	0	1.433	29.99	124182	81750.4	17.61	23.24	High	High	High	High	Peak Found	High	1
0	High	Master Protein	P23083	Immunoglobulin heavy variable 1-2 OS=Homo sapiens OX=9606 GN=IGHV1-2 PE=1 SV=2	0		7.695	28	3	3	4	1	117	13.1	9.13	10.31	3	1	1.342	19.25	243279	134443	18.24	30.28	Peak Found	High	Peak Found	Peak Found	Not Found	Peak Found	1
0	High	Master Protein	P06310	Immunoglobulin kappa variable 2-30 OS=Homo sapiens OX=9606 GN=IGKV2-30 PE=3 SV=2	0		26.052	40	4	5	55	3	120	13.2	8.51	176.54	4	1	1.781	26.53	859099	441301	21.06	17.24	High	High	High	High	High	High	1
0	High	Master Protein	A0A0B4J1Y9	Immunoglobulin heavy variable 3-72 OS=Homo sapiens OX=9606 GN=IGHV3-72 PE=3 SV=1	0		34.668	25	3	3	122	1	119	13.2	7.85	476.17	3	0	1.494	39.26	54580.8	30247.4	19.2	38.19	High	Peak Found	High	Peak Found	Peak Found	Peak Found	1
0	High	Master Protein	A0A087WW87	Immunoglobulin kappa variable 2-40 OS=Homo sapiens OX=9606 GN=IGKV2-40 PE=3 SV=2	0		15.057	36	3	3	39	1	121	13.3	4.61	106.93	3	1	1.372	41.96	184007	157858	41.71	60.59	High	Peak Found	High	Peak Found	Peak Found	Peak Found	1
0	High	Master Protein	P06312	Immunoglobulin kappa variable 4-1 OS=Homo sapiens OX=9606 GN=IGKV4-1 PE=1 SV=1	0		25.973	35	3	3	83	3	121	13.4	5.25	313.81	3	0	1.692	72.45	382181	272524	35.44	9.51	High	High	High	High	High	High	1
0	High	Master Protein	P0DJI9	Serum amyloid A-2 proteincur OS=Homo sapiens OX=9606 GN=SAA2 PE=1 SV=1	0		82.094	63	13	13	166	6	122	13.5	9.14	505.16	13	6	6.05	127.7	4.19201e+06	148306	78.17	136.7	High	High	High	High	High	Peak Found	1
0	High	Master Protein	P0DJI8	Serum amyloid A-1 protein OS=Homo sapiens OX=9606 GN=SAA1 PE=1 SV=1	0		82.926	66	11	11	183	4	122	13.5	6.79	555.99	11	0	3.747	142.31	1.75703e+06	11459.1	81.37	168.66	High	High	High	Peak Found	High	Peak Found	1
0	High	Master Protein	P06331	Immunoglobulin heavy variable 4-34 OS=Homo sapiens OX=9606 GN=IGHV4-34 PE=1 SV=2	0		21.699	20	3	3	81	3	123	13.8	9.33	289.27	3	0	1.543	38.38	363207	188182	30.25	41.11	High	High	High	High	High	High	1
0	High	Master Protein	P02775	Platelet basic protein OS=Homo sapiens OX=9606 GN=PPBP PE=1 SV=3	0		7.235	20	2	2	12	2	128	13.9	8.79	35.16	2	0	1.419	122.28	54593.4	35980.7	25.85	116.5	High	High	High	High	Peak Found	Peak Found	1
0	High	Master Protein	P62987	Ubiquitin-60S ribosomal protein L40 OS=Homo sapiens OX=9606 GN=UBA52 PE=1 SV=2	0		5.448	13	1	1	18	1	128	14.7	9.83	50.27	1	0	0.397	43.26	18889.7	47626.1	52.86	8.18	High	High	High	High	High	High	1
0	High	Master Protein	P35542	Serum amyloid A-4 protein OS=Homo sapiens OX=9606 GN=SAA4 PE=1 SV=2	0		23.958	35	4	5	126	4	130	14.7	9.07	380.56	4	0	0.497	58.11	755560	2.0466e+06	25.12	37.19	High	High	High	High	High	High	1
0	High	Master Protein	P69905	Hemoglobin subunit alpha OS=Homo sapiens OX=9606 GN=HBA1 PE=1 SV=2	0		71.961	71	8	9	374	8	142	15.2	8.68	1067.51	8	0	0.4	53.89	1.19462e+07	2.78309e+07	19.56	26.55	High	High	High	High	High	High	1
0	High	Master Protein	P02766	Transthyretin OS=Homo sapiens OX=9606 GN=TTR PE=1 SV=1	0		9.169	24	2	2	22	2	147	15.9	5.76	68.46	2	0	0.634	37.07	42758.4	56371.6	27.76	11.44	High	High	High	High	High	High	1
0	High	Master Protein	Q9NZT1	Calmodulin-like protein 5 OS=Homo sapiens OX=9606 GN=CALML5 PE=1 SV=2	0		4.242	16	1	1	1	1	146	15.9	4.44	2.45	1	0							Not Found	High	Not Found	Not Found	Not Found	Not Found	1
0	High	Master Protein	P68871	Hemoglobin subunit beta OS=Homo sapiens OX=9606 GN=HBB PE=1 SV=2	0		93.728	78	10	11	551	5	147	16	7.28	1626.8	10	5	0.393	67.32	9.31416e+06	2.27084e+07	46.33	28.11	High	High	High	High	High	High	1
0	High	Master Protein	P02042	Hemoglobin subunit delta OS=Homo sapiens OX=9606 GN=HBD PE=1 SV=2	0		58.548	63	8	10	180	3	147	16	8.05	380.49	8	0	0.263	54.7	37658.4	206082	56.25	56.19	Peak Found	High	High	High	High	High	1
0	High	Master Protein	P61626	Lysozyme C OS=Homo sapiens OX=9606 GN=LYZ PE=1 SV=1	0		13.246	33	3	3	32	3	148	16.5	9.16	97.52	3	0	0.603	53.48	76166.9	136825	73.44	59.64	High	High	High	High	High	High	1
0	High	Master Protein	Q8WVJ2	NudC domain-containing protein 2 OS=Homo sapiens OX=9606 GN=NUDCD2 PE=1 SV=1	0		4.478	12	1	1	17	1	157	17.7	5.07	68.21	1	0	1.406	72.55	470729	334696	47.59	69.72	High	High	High	High	High	Peak Found	1
0	High	Master Protein	P01591	Immunoglobulin J chain OS=Homo sapiens OX=9606 GN=JCHAIN PE=1 SV=4	0		8.3	17	2	2	27	2	159	18.1	5.24	72.52	2	0	1.835	28.48	138943	63815.2	18.94	14.6	High	High	High	High	High	High	1
0	High	Master Protein	P01344	Insulin-like growth factor II OS=Homo sapiens OX=9606 GN=IGF2 PE=1 SV=1	0		4.639	14	2	2	2	2	180	20.1	9.32	5.05	2	0	0.01			13793.8		87.87	Not Found	Not Found	Not Found	Peak Found	High	Not Found	1
0	High	Master Protein	P05090	Apolipoprotein D OS=Homo sapiens OX=9606 GN=APOD PE=1 SV=1	0		17.987	26	4	5	43	4	189	21.3	5.15	107.69	4	0	1.043	45.22	185212	156960	52.65	37.78	High	High	High	High	High	High	1
0	High	Master Protein	P07360	Complement component C8 gamma chain OS=Homo sapiens OX=9606 GN=C8G PE=1 SV=3	0		22.008	31	4	4	33	4	202	22.3	8.31	104.98	4	0	1.311	20.65	122179	88073.5	17.52	9.72	High	High	High	High	High	High	1
0	High	Master Protein	B9A064	Immunoglobulin lambda-like polypeptide 5 OS=Homo sapiens OX=9606 GN=IGLL5 PE=2 SV=2	0		50.972	34	7	7	363	3	214	23	8.84	1105.62	7	4	1.552	41.3	2.31097e+06	1.40637e+06	10.86	7.43	High	High	High	High	High	High	1
0	High	Master Protein	P0DOX7	Immunoglobulin kappa light chain OS=Homo sapiens OX=9606 PE=1 SV=1	0		160.093	57	15	16	1014	2	214	23.4	7.17	3504.55	15	11	1.439	45.64	1.75667e+07	1.20955e+07	5.29	9.37	High	High	High	High	High	High	1
0	High	Master Protein	P02741	C-reactive protein OS=Homo sapiens OX=9606 GN=CRP PE=1 SV=1	0		5.272	9	2	2	20	2	224	25	5.63	45.69	2	0	0.882	34.72	157853	172605	28.92	15.33	High	High	High	High	High	High	1
0	High	Master Protein	P02743	Serum amyloid P-component OS=Homo sapiens OX=9606 GN=APCS PE=1 SV=2	0		13.221	20	4	4	12	4	223	25.4	6.54	29.61	4	0	1.077	44.54	110822	114384	39.46	16.96	High	Peak Found	High	Peak Found	High	High	1
0	High	Master Protein	P02747	Complement C1q subcomponent subunit C OS=Homo sapiens OX=9606 GN=C1QC PE=1 SV=3	0		13.262	16	3	3	31	3	245	25.8	8.41	85.4	3	0	1.656	34.65	149882	93477.3	27.31	6.78	High	High	High	High	High	High	1
0	High	Master Protein	P02746	Complement C1q subcomponent subunit B OS=Homo sapiens OX=9606 GN=C1QB PE=1 SV=3	0		6.628	6	1	1	10	1	253	26.7	8.63	32.69	1	0	1.863	75.24	27168.5	14586.7	37.48	88.82	High	High	High	Peak Found	Peak Found	High	1
0	High	Master Protein	P31944	Caspase-14 OS=Homo sapiens OX=9606 GN=CASP14 PE=1 SV=2	0		10.892	9	2	3	18	2	242	27.7	5.58	58.67	2	0	0.604	43.6	93753.1	145188	38.2	23.17	High	High	Peak Found	High	High	High	1
0	High	Master Protein	P02647	Apolipoprotein A-I OS=Homo sapiens OX=9606 GN=APOA1 PE=1 SV=1	0		129.178	61	21	22	773	21	267	30.8	5.76	2105.35	21	0	1.052	50.43	1.7002e+07	1.81085e+07	21.41	5.78	High	High	High	High	High	High	1
0	High	Master Protein	P35030	Trypsin-3 OS=Homo sapiens OX=9606 GN=PRSS3 PE=1 SV=2	0.004		3.727	3	1	1	9	1	304	32.5	7.49	21.18	1	0	0.781	82.19	24993.5	31688.3	67.63	60.51	High	High	Peak Found	High	High	High	1
0	High	Master Protein	P25311	Zinc-alpha-2-glycoprotein OS=Homo sapiens OX=9606 GN=AZGP1 PE=1 SV=2	0.004		3.198	4	1	1	1	1	298	34.2	6.05	3.16	1	0	0.72	48.79	16264.7	15157.8	26.82	38.88	Peak Found	Peak Found	Peak Found	Peak Found	Peak Found	High	1
0	High	Master Protein	P01859	Immunoglobulin heavy constant gamma 2 OS=Homo sapiens OX=9606 GN=IGHG2 PE=1 SV=2	0		153.679	58	17	19	899	3	326	35.9	7.59	2138.08	17	3	3.008	70.02	3.88022e+06	2.02119e+06	22.8	26.99	High	High	High	High	High	High	1
0	High	Master Protein	P01861	Immunoglobulin heavy constant gamma 4 OS=Homo sapiens OX=9606 GN=IGHG4 PE=1 SV=1	0		110.129	53	14	15	497	3	327	35.9	7.36	1438.87	14	0	1.485	38.27	578824	280883	28.02	21.39	High	High	High	High	High	High	1
0	High	Master Protein	P04406	Glyceraldehyde-3-phosphate dehydrogenase OS=Homo sapiens OX=9606 GN=GAPDH PE=1 SV=3	0		5.14	9	2	2	8	2	335	36	8.46	17.87	2	0	0.517	83.21	17583.5	43570.4	81.8	19.85	Peak Found	High	Peak Found	High	High	High	1
0	High	Master Protein	P02649	Apolipoprotein E OS=Homo sapiens OX=9606 GN=APOE PE=1 SV=1	0		52.879	34	9	9	142	9	317	36.1	5.73	509.02	9	0	0.989	26.6	703438	698688	9.89	13.61	High	High	High	High	High	High	1
0	High	Master Protein	P01876	Immunoglobulin heavy constant alpha 1 OS=Homo sapiens OX=9606 GN=IGHA1 PE=1 SV=2	0		99.979	46	13	15	535	11	353	37.6	6.51	1741.43	13	2	1.688	47.23	1.20013e+07	6.33375e+06	25.49	20.78	High	High	High	High	High	High	1
0	High	Master Protein	O43866	CD5 antigen-like OS=Homo sapiens OX=9606 GN=CD5L PE=1 SV=1	0		13.871	14	3	3	11	3	347	38.1	5.47	27.89	3	0	2.009	38.88	112716	40559.1	19.61	31.29	High	High	High	Peak Found	Peak Found	High	1
0	High	Master Protein	P02750	Leucine-rich alpha-2-glycoprotein OS=Homo sapiens OX=9606 GN=LRG1 PE=1 SV=2	0		11.909	11	3	3	63	3	347	38.2	6.95	142.97	3	0	0.936	25.45	95706.4	106062	15.32	4.42	High	High	High	High	High	High	1
0	High	Master Protein	P02749	Beta-2-glycoprotein 1 OS=Homo sapiens OX=9606 GN=APOH PE=1 SV=3	0		34.442	26	7	7	84	7	345	38.3	7.97	245.15	7	0	0.763	29.46	249100	324506	12.03	7.32	High	High	High	High	High	High	1
0	High	Master Protein	P07355	Annexin A2 OS=Homo sapiens OX=9606 GN=ANXA2 PE=1 SV=2	0		5.707	6	2	2	3	2	339	38.6	7.75	8.14	2	0	0.735	58.88	329905	411337	25.12	17.76	Peak Found	High	Peak Found	High	Peak Found	Peak Found	1
0	High	Master Protein	P02760	Protein AMBP OS=Homo sapiens OX=9606 GN=AMBP PE=1 SV=1	0		13.611	13	3	3	27	3	352	39	6.25	71.96	3	0	1.408	32.41	234593	152145	16.88	29.23	High	High	High	High	High	High	1
0	High	Master Protein	P00739	Haptoglobin-related protein OS=Homo sapiens OX=9606 GN=HPR PE=2 SV=2	0		95.292	36	17	18	364	2	348	39	7.09	1096	17	0	1.356	44.29	72667.5	44411.6	29.78	28.05	High	High	High	High	High	High	1
0	High	Master Protein	P02765	Alpha-2-HS-glycoprotein OS=Homo sapiens OX=9606 GN=AHSG PE=1 SV=2	0		30.36	16	5	6	57	5	367	39.3	5.72	166.19	5	0	1.056	42.14	248554	205900	25.12	27.84	High	High	High	High	High	High	1
0	High	Master Protein	P27169	Serum paraoxonase/arylesterase 1 OS=Homo sapiens OX=9606 GN=PON1 PE=1 SV=3	0		21.34	14	3	3	62	3	355	39.7	5.22	185.53	3	0	1.215	46.56	128736	107794	7.45	2.78	High	High	High	High	High	High	1
0	High	Master Protein	P01860	Immunoglobulin heavy constant gamma 3 OS=Homo sapiens OX=9606 GN=IGHG3 PE=1 SV=2	0		140.211	53	17	19	829	4	377	41.3	7.9	1927.38	17	7	1.66	33.47	1.42489e+07	7.64333e+06	21.08	18.74	High	High	High	High	High	High	1
0	High	Master Protein	O14791	Apolipoprotein L1 OS=Homo sapiens OX=9606 GN=APOL1 PE=1 SV=5	0		10.882	6	2	2	22	2	398	43.9	5.81	76.48	2	0	1.171	54.23	75048.1	56706.7	18.84	36.55	High	High	High	High	High	High	1
0	High	Master Protein	P29508	Serpin B3 OS=Homo sapiens OX=9606 GN=SERPINB3 PE=1 SV=2	0		4.755	5	1	1	1	1	390	44.5	6.81	3.31	1	0	0.851	55.73	6077.47	7417.78	52.8	7.05	Peak Found	High	Not Found	Peak Found	Peak Found	Peak Found	1
0	High	Master Protein	P08185	Corticosteroid-binding globulin OS=Homo sapiens OX=9606 GN=SERPINA6 PE=1 SV=1	0		8.146	6	2	2	16	2	405	45.1	6.04	38.69	2	0	1.04	17.31	22911.7	21515.7	3.88	5.44	High	High	High	High	High	High	1
0	High	Master Protein	P00738	Haptoglobin OS=Homo sapiens OX=9606 GN=HP PE=1 SV=1	0		240.853	64	28	31	983	13	406	45.2	6.58	3015.08	28	15	1.548	46.11	2.65371e+07	1.6927e+07	24.75	8.81	High	High	High	High	High	High	1
0	High	Master Protein	P06727	Apolipoprotein A-IV OS=Homo sapiens OX=9606 GN=APOA4 PE=1 SV=4	0		23.955	17	6	6	39	6	396	45.3	5.38	103.65	6	0	1.054	41.3	156688	135543	17.89	27.13	High	High	High	High	High	High	1
0	High	Master Protein	P01009	Alpha-1-antitrypsin OS=Homo sapiens OX=9606 GN=SERPINA1 PE=1 SV=3	0		234.023	63	31	37	852	31	418	46.7	5.59	2266.18	31	0	1.261	54.92	1.59884e+07	1.20227e+07	15.78	7.99	High	High	High	High	High	High	1
0	High	Master Protein	P01011	Alpha-1-antichymotrypsin OS=Homo sapiens OX=9606 GN=SERPINA3 PE=1 SV=2	0		83.778	30	13	13	336	13	423	47.6	5.52	1117.08	13	0	1.267	34.16	3.25388e+06	2.65231e+06	12.12	4.63	High	High	High	High	High	High	1
0	High	Master Protein	Q04695	Keratin, type I cytoskeletal 17 OS=Homo sapiens OX=9606 GN=KRT17 PE=1 SV=2	0		58.163	27	12	14	191	4	432	48.1	5.02	540.73	12	0	0.575	100.6	24168.2	60290.7	118.6	41.19	Peak Found	High	Peak Found	High	High	High	1
0	High	Master Protein	P0DOX2	Immunoglobulin alpha-2 heavy chain OS=Homo sapiens OX=9606 PE=1 SV=2	0		41.899	22	8	9	174	5	455	48.9	6.67	560.93	8	1	1.591	43.71	1.32356e+06	700243	18.14	33.52	High	High	High	High	High	High	1
0	High	Master Protein	P0DOX5	Immunoglobulin gamma-1 heavy chain OS=Homo sapiens OX=9606 PE=1 SV=2	0		212.403	54	27	27	940	15	449	49.3	8.72	2584.65	27	12	1.575	50.4	3.39111e+07	2.17653e+07	18.48	13.01	High	High	High	High	High	High	1
0	High	Master Protein	P01871	Immunoglobulin heavy constant mu OS=Homo sapiens OX=9606 GN=IGHM PE=1 SV=4	0		89.167	32	11	13	266	11	453	49.4	6.77	685.24	11	0	2.172	58.74	3.02079e+06	1.15684e+06	35.81	26.16	High	High	High	High	High	High	1
0	High	Master Protein	P13646	Keratin, type I cytoskeletal 13 OS=Homo sapiens OX=9606 GN=KRT13 PE=1 SV=4	0		28.03	15	7	7	125	2	458	49.6	4.96	303.48	7	0	100		43939.4				Not Found	High	Not Found	Not Found	Not Found	Not Found	1
0	High	Master Protein	Q7Z3Y8	Keratin, type I cytoskeletal 27 OS=Homo sapiens OX=9606 GN=KRT27 PE=1 SV=2	0		23.623	9	5	6	180	1	459	49.8	5.05	461.78	5	0	4.096	0	12700.9	3100.94			High	Not Found	Not Found	Peak Found	Not Found	Not Found	1
0	High	Master Protein	Q6KB66	Keratin, type II cytoskeletal 80 OS=Homo sapiens OX=9606 GN=KRT80 PE=1 SV=2	0		11.674	11	4	4	9	4	452	50.5	5.67	22.7	4	0	0.922	73.8	16714.2	37842.2	79.48	44.3	Peak Found	High	Peak Found	High	Peak Found	Peak Found	1
0	High	Master Protein	P08779	Keratin, type I cytoskeletal 16 OS=Homo sapiens OX=9606 GN=KRT16 PE=1 SV=4	0		117.297	43	20	22	350	10	473	51.2	5.05	955.75	20	0	0.604	107.61	148095	386846	122.03	38.68	Peak Found	High	High	High	High	High	1
0	High	Master Protein	P02679	Fibrinogen gamma chain OS=Homo sapiens OX=9606 GN=FGG PE=1 SV=3	0		127.603	50	17	19	360	17	453	51.5	5.62	1042.95	17	0	2.624	68.59	4.90521e+06	1.97814e+06	49.58	11.21	High	High	High	High	High	High	1
0	High	Master Protein	Q15517	Corneodesmosin OS=Homo sapiens OX=9606 GN=CDSN PE=1 SV=3	0.004		3.281	3	1	1	6	1	529	51.5	8.35	11.47	1	0	0.447	92.49	17403.8	39712.1	82.43	30.92	Peak Found	High	Peak Found	High	High	High	1
0	High	Master Protein	P02533	Keratin, type I cytoskeletal 14 OS=Homo sapiens OX=9606 GN=KRT14 PE=1 SV=4	0		147.157	51	24	29	486	10	472	51.5	5.16	1443.54	24	13	0.479	99.07	769664	2.66249e+06	107.91	17.48	High	High	High	High	High	High	1
0	High	Master Protein	P02790	Hemopexin OS=Homo sapiens OX=9606 GN=HPX PE=1 SV=2	0		75.349	40	14	14	243	14	462	51.6	7.02	623.76	14	0	1.435	66.93	3.12145e+06	2.19629e+06	25.55	5.63	High	High	High	High	High	High	1
0	High	Master Protein	P10909	Clusterin OS=Homo sapiens OX=9606 GN=CLU PE=1 SV=1	0		52.104	23	7	9	112	7	449	52.5	6.27	335.32	7	0	1.311	29.97	519563	392733	7.8	20.37	High	High	High	High	High	High	1
0	High	Master Protein	P01008	Antithrombin-III OS=Homo sapiens OX=9606 GN=SERPINC1 PE=1 SV=1	0		67.068	26	10	15	179	10	464	52.6	6.71	481.43	10	0	1.506	41.58	718635	527900	26.47	13.1	High	High	High	High	High	High	1
0	High	Master Protein	P02774	Vitamin D-binding protein OS=Homo sapiens OX=9606 GN=GC PE=1 SV=2	0		108.003	52	16	19	312	16	474	52.9	5.45	984.26	16	0	1.04	35.31	1.96586e+06	1.88753e+06	5.04	6.13	High	High	High	High	High	High	1
0	High	Master Protein	P01019	Angiotensinogen OS=Homo sapiens OX=9606 GN=AGT PE=1 SV=1	0		41.596	15	6	6	79	6	485	53.1	6.32	216.69	6	0	1.085	36.44	337701	300779	22.67	8.77	High	High	High	High	High	High	1
0	High	Master Protein	P04217	Alpha-1B-glycoprotein OS=Homo sapiens OX=9606 GN=A1BG PE=1 SV=4	0		41.031	19	8	8	113	8	495	54.2	5.86	289.72	8	0	1.019	28.19	485726	436164	15.04	17	High	High	High	High	High	High	1
0	High	Master Protein	P04004	Vitronectin OS=Homo sapiens OX=9606 GN=VTN PE=1 SV=1	0		33.038	22	7	7	85	7	478	54.3	5.8	240.53	7	0	1.042	60.75	258188	247866	19.76	11.48	High	High	High	High	High	High	1
0	High	Master Protein	P08697	Alpha-2-antiplasmin OS=Homo sapiens OX=9606 GN=SERPINF2 PE=1 SV=3	0		13.826	12	4	4	28	4	491	54.5	6.29	73.31	4	0	1.261	24.51	153318	115507	7.23	0.78	High	High	High	High	High	High	1
0	High	Master Protein	P05155	Plasma protease C1 inhibitor OS=Homo sapiens OX=9606 GN=SERPING1 PE=1 SV=2	0		34.996	17	8	9	107	8	500	55.1	6.55	279.79	8	0	1.552	45.66	848823	476749	19.45	26.55	High	High	High	High	High	High	1
0	High	Master Protein	P02675	Fibrinogen beta chain OS=Homo sapiens OX=9606 GN=FGB PE=1 SV=2	0		224.502	56	26	32	444	26	491	55.9	8.27	1443.01	26	0	2.27	62.39	4.1417e+06	1.79162e+06	38.96	17.27	High	High	High	High	High	High	1
0	High	Master Protein	P0DOX3	Immunoglobulin delta heavy chain OS=Homo sapiens OX=9606 PE=1 SV=1	0		12.218	9	3	3	12	3	512	56.2	8.02	24.71	3	0	1.887	35.03	59165.6	32453	27.49	31.02	High	High	High	Peak Found	Peak Found	High	1
0	High	Master Protein	Q8N1N4	Keratin, type II cytoskeletal 78 OS=Homo sapiens OX=9606 GN=KRT78 PE=1 SV=2	0		25.748	12	7	7	79	4	520	56.8	6.02	160.84	7	1	0.606	73.71	34487.7	78732.6	64.39	17.14	Peak Found	High	Peak Found	High	Peak Found	High	1
0	High	Master Protein	P05546	Heparin cofactor 2 OS=Homo sapiens OX=9606 GN=SERPIND1 PE=1 SV=3	0		4.935	3	2	2	9	2	499	57	6.9	16.71	2	0	1.539	53	94055.5	60276.2	23.27	16.34	High	High	High	Peak Found	High	Peak Found	1
0	High	Master Protein	P04745	Alpha-amylase 1 OS=Homo sapiens OX=9606 GN=AMY1A PE=1 SV=2	0		4.462	3	1	1	3	1	511	57.7	6.93	8.11	1	0	0.01			13637.9		57.85	Not Found	Not Found	Not Found	Peak Found	Peak Found	High	1
0	High	Master Protein	Q7RTS7	Keratin, type II cytoskeletal 74 OS=Homo sapiens OX=9606 GN=KRT74 PE=1 SV=2	0		19.548	8	5	5	97	1	529	57.8	7.71	228.14	5	0	0.304	42.89	22760	74924.8	116.18	18.78	High	High	High	High	High	High	1
0	High	Master Protein	P13645	Keratin, type I cytoskeletal 10 OS=Homo sapiens OX=9606 GN=KRT10 PE=1 SV=6	0		311.824	54	40	45	1399	34	584	58.8	5.21	4533	40	7	0.522	89.37	1.86326e+07	4.84166e+07	79.45	17.18	High	High	High	High	High	High	1
0	High	Master Protein	P04196	Histidine-rich glycoprotein OS=Homo sapiens OX=9606 GN=HRG PE=1 SV=1	0		23.427	10	4	4	46	4	525	59.5	7.5	131.94	4	0	0.957	50.59	76106.9	63038	21.43	21.61	High	High	High	High	High	High	1
0	High	Master Protein	P04040	Catalase OS=Homo sapiens OX=9606 GN=CAT PE=1 SV=3	0		3.96	2	1	1	6	1	527	59.7	7.39	16.42	1	0	0.335	45.72	4133.94	12477.4	87.82	16.72	Peak Found	High	Peak Found	High	High	High	1
0	High	Master Protein	P02538	Keratin, type II cytoskeletal 6A OS=Homo sapiens OX=9606 GN=KRT6A PE=1 SV=3	0		86.372	37	20	20	306	3	564	60	8	850.84	20	6	0.586	104.5	116845	289981	114.01	62.8	High	High	High	High	High	High	1
0	High	Master Protein	P04259	Keratin, type II cytoskeletal 6B OS=Homo sapiens OX=9606 GN=KRT6B PE=1 SV=5	0		74.694	33	18	18	319	1	564	60	8	941.87	18	0	0.395	110.33	19316.7	38794.7	99.94	82.94	Peak Found	Peak Found	Not Found	Peak Found	Peak Found	High	1
0	High	Master Protein	P22792	Carboxypeptidase N subunit 2 OS=Homo sapiens OX=9606 GN=CPN2 PE=1 SV=3	0		5.67	3	1	1	19	1	545	60.5	5.99	50.66	1	0	1.075	50.57	15572.4	14485.9	36.75	17.21	High	High	High	High	High	High	1
0	High	Master Protein	Q7Z794	Keratin, type II cytoskeletal 1b OS=Homo sapiens OX=9606 GN=KRT77 PE=1 SV=3	0		29.466	7	5	5	146	1	578	61.9	5.99	424.29	5	0	1.379	30.65	41270.8	29934	13.92	53.23	Peak Found	Peak Found	Peak Found	High	Peak Found	High	1
0	High	Master Protein	P35527	Keratin, type I cytoskeletal 9 OS=Homo sapiens OX=9606 GN=KRT9 PE=1 SV=3	0		250.381	64	35	40	1068	35	623	62	5.24	3651.99	35	0	0.493	99.3	9.41827e+06	2.2182e+07	90	30.84	High	High	High	High	High	High	1
0	High	Master Protein	P49190	Parathyroid hormone 2 receptor OS=Homo sapiens OX=9606 GN=PTH2R PE=1 SV=1	0.004		3.323	2	1	1	4	1	550	62.2	7.08	9.88	1	0	1.058	37.34	24685	20289	29.76	19.42	Peak Found	High	Peak Found	Peak Found	High	High	1
0	High	Master Protein	P13647	Keratin, type II cytoskeletal 5 OS=Homo sapiens OX=9606 GN=KRT5 PE=1 SV=3	0		148.154	42	29	35	529	19	590	62.3	7.74	1480.55	29	3	0.426	94.48	1.36034e+06	4.47896e+06	98.66	16.57	High	High	High	High	High	High	1
0	High	Master Protein	Q14520	Hyaluronan-binding protein 2 OS=Homo sapiens OX=9606 GN=HABP2 PE=1 SV=1	0		8.874	5	2	2	6	2	560	62.6	6.54	13.91	2	0	1.075	21.33	30807.2	25211.3	15.72	11.94	High	High	High	Peak Found	Peak Found	Peak Found	1
0	High	Master Protein	P02748	Complement component C9 OS=Homo sapiens OX=9606 GN=C9 PE=1 SV=2	0		37.623	24	9	9	96	9	559	63.1	5.59	263.57	9	0	1.473	32.64	329681	165075	26.27	34.6	High	High	High	High	High	High	1
0	High	Master Protein	Q5T749	Keratinocyte proline-rich protein OS=Homo sapiens OX=9606 GN=KPRP PE=1 SV=1	0.004		3.291	2	1	1	7	1	579	64.1	8.27	18.94	1	0	0.651	71.29	24184.5	52324	88.48	38.4	Peak Found	High	High	High	High	Peak Found	1
0	High	Master Protein	P07357	Complement component C8 alpha chain OS=Homo sapiens OX=9606 GN=C8A PE=1 SV=2	0		14.819	12	4	4	25	4	584	65.1	6.47	67.06	4	0	1.364	34.61	76489.8	42196.5	14.96	28.62	High	High	High	High	High	High	1
0	High	Master Protein	P35908	Keratin, type II cytoskeletal 2 epidermal OS=Homo sapiens OX=9606 GN=KRT2 PE=1 SV=2	0		336.672	68	45	51	1174	37	639	65.4	8	3831.86	45	3	0.543	90.92	9.96354e+06	2.50544e+07	77.09	17.5	High	High	High	High	High	High	1
0	High	Master Protein	P05156	Complement factor I OS=Homo sapiens OX=9606 GN=CFI PE=1 SV=2	0		19.318	10	4	4	19	4	583	65.7	7.5	46.27	4	0	0.925	27.96	72611	77595.6	11.8	9.74	High	High	Peak Found	High	High	High	1
0	High	Master Protein	P04264	Keratin, type II cytoskeletal 1 OS=Homo sapiens OX=9606 GN=KRT1 PE=1 SV=6	0		396.142	66	52	63	2027	44	644	66	8.12	6707.75	52	8	0.485	95.98	2.43492e+07	5.75143e+07	84.34	20.66	High	High	High	High	High	High	1
0	High	Master Protein	P04003	C4b-binding protein alpha chain OS=Homo sapiens OX=9606 GN=C4BPA PE=1 SV=2	0		59.848	24	10	11	108	10	597	67	7.3	281.71	10	0	1.806	41.97	488930	259504	28.03	20.97	High	High	High	High	High	High	1
0	High	Master Protein	P07358	Complement component C8 beta chain OS=Homo sapiens OX=9606 GN=C8B PE=1 SV=3	0		10.572	6	3	3	13	3	591	67	8.13	29.44	3	0	1.345	25.56	33667.1	24213.3	36.83	5.67	High	High	High	Peak Found	High	High	1
0	High	Master Protein	P00748	Coagulation factor XII OS=Homo sapiens OX=9606 GN=F12 PE=1 SV=3	0		12.449	9	3	3	9	3	615	67.7	7.74	23	3	0	1.501	50.77	48674.9	32300.4	26.5	21.29	High	High	High	Peak Found	High	High	1
0	High	Master Protein	P43652	Afamin OS=Homo sapiens OX=9606 GN=AFM PE=1 SV=1	0		27.674	13	6	6	82	6	599	69	5.9	212.49	6	0	1.166	30.09	179778	171241	2.45	18.72	High	High	High	High	High	High	1
0	High	Master Protein	P02768	Albumin OS=Homo sapiens OX=9606 GN=ALB PE=1 SV=2	0		913.364	85	118	130	6111	118	609	69.3	6.28	18381	118	0	1.031	49.17	6.28356e+08	6.18259e+08	8.53	5.64	High	High	High	High	High	High	1
0	High	Master Protein	P00734	Prothrombin OS=Homo sapiens OX=9606 GN=F2 PE=1 SV=2	0		66.224	30	12	13	167	12	622	70	5.9	464.09	12	0	1.282	47.38	572080	438468	17.8	8.6	High	High	High	High	High	High	1
0	High	Master Protein	P03952	Plasma kallikrein OS=Homo sapiens OX=9606 GN=KLKB1 PE=1 SV=1	0		10.373	6	3	3	11	3	638	71.3	8.22	26.11	3	0	0.992	26.89	61648.9	56193.9	11.4	26.21	High	High	High	Peak Found	High	High	1
0	High	Master Protein	P01042	Kininogen-1 OS=Homo sapiens OX=9606 GN=KNG1 PE=1 SV=2	0		39.54	21	9	9	128	9	644	71.9	6.81	348.63	9	0	1.115	46.99	657317	541960	14.39	7.1	High	High	High	High	High	High	1
0	High	Master Protein	Q08188	Protein-glutamine gamma-glutamyltransferase E OS=Homo sapiens OX=9606 GN=TGM3 PE=1 SV=4	0		5.245	3	1	1	5	1	693	76.6	5.86	14.63	1	0	1.352	80.82	13822	10223.5		67.69	Not Found	High	Not Found	High	High	Peak Found	1
0	High	Master Protein	P09871	Complement C1s subcomponent OS=Homo sapiens OX=9606 GN=C1S PE=1 SV=1	0		17.014	13	5	5	26	5	688	76.6	4.96	57.8	5	0	1.177	30.72	53144.5	39005.4	19.14	15.64	High	High	High	High	High	High	1
0	High	Master Protein	O94808	Glutamine--fructose-6-phosphate aminotransferase [isomerizing] 2 OS=Homo sapiens OX=9606 GN=GFPT2 PE=1 SV=3	0		3.876	3	1	1	12	1	682	76.9	7.37	43.37	1	0	1.091	48.27	7.14516e+06	6.55108e+06	23.75	65.21	High	High	High	High	High	High	1
0	High	Master Protein	P02787	Serotransferrin OS=Homo sapiens OX=9606 GN=TF PE=1 SV=3	0		431.097	63	55	63	1698	55	698	77	7.12	5284.91	55	0	1.147	53.99	2.79678e+07	2.42232e+07	14.5	8.62	High	High	High	High	High	High	1
0	High	Master Protein	P00736	Complement C1r subcomponent OS=Homo sapiens OX=9606 GN=C1R PE=1 SV=2	0.004		3.247	2	1	1	6	1	705	80.1	6.21	15.01	1	0	1.312	12.26	18508.9	14103.1	6.93	20.31	High	Peak Found	High	High	High	High	1
0	High	Master Protein	Q8TAM1	Bardet-Biedl syndrome 10 protein OS=Homo sapiens OX=9606 GN=BBS10 PE=1 SV=2	0		4.074	3	1	1	11	1	723	80.8	7.77	37.74	1	0	0.581	20.91	576814	1.0429e+06	7.07	72.84	High	Peak Found	High	High	High	Peak Found	1
0	High	Master Protein	P14923	Junction plakoglobin OS=Homo sapiens OX=9606 GN=JUP PE=1 SV=3	0		32.641	11	7	8	46	7	745	81.7	6.14	109.47	7	0	0.43	72.59	54498.1	147701	86.46	31.86	Peak Found	High	Peak Found	High	High	High	1
0	High	Master Protein	Q13835	Plakophilin-1 OS=Homo sapiens OX=9606 GN=PKP1 PE=1 SV=2	0		5.661	2	1	1	6	1	747	82.8	9.13	16.7	1	0	0.579	112.05	7444.58	22558.9	86.51	38.37	Peak Found	High	Peak Found	High	Peak Found	High	1
0	High	Master Protein	P00751	Complement factor B OS=Homo sapiens OX=9606 GN=CFB PE=1 SV=2	0		56.519	22	11	11	132	11	764	85.5	7.06	370.56	11	0	1.153	39.04	495327	382810	20.55	7.39	High	High	High	High	High	High	1
0	High	Master Protein	P06396	Gelsolin OS=Homo sapiens OX=9606 GN=GSN PE=1 SV=1	0		36.327	18	9	9	82	9	782	85.6	6.28	216.88	9	0	1.206	38.08	625677	685371	1.94	60.54	High	High	High	High	High	High	1
0	High	Master Protein	P00747	Plasminogen OS=Homo sapiens OX=9606 GN=PLG PE=1 SV=2	0		96.837	36	21	22	198	21	810	90.5	7.24	482.63	21	0	1.28	46.84	1.4801e+06	1.34499e+06	8.47	25.47	High	High	High	High	High	High	1
0	High	Master Protein	P10643	Complement component C7 OS=Homo sapiens OX=9606 GN=C7 PE=1 SV=2	0		9.49	6	3	3	11	3	843	93.5	6.48	19.66	3	0	1.728	38.35	59235.1	31055.2	42.44	31.32	High	Peak Found	High	Peak Found	High	Peak Found	1
0	High	Master Protein	P02671	Fibrinogen alpha chain OS=Homo sapiens OX=9606 GN=FGA PE=1 SV=2	0		233.756	40	34	38	596	34	866	94.9	6.01	1725.53	34	0	2.098	60.15	7.76765e+06	3.60945e+06	40.98	7.89	High	High	High	High	High	High	1
0	High	Master Protein	Q08554	Desmocollin-1 OS=Homo sapiens OX=9606 GN=DSC1 PE=1 SV=2	0		10.767	3	2	2	6	2	894	99.9	5.43	13.34	2	0	0.522	92.01	30301.2	67362.6	100.96	27.73	Peak Found	High	Peak Found	High	Peak Found	Peak Found	1
0	High	Master Protein	P19827	Inter-alpha-trypsin inhibitor heavy chain H1 OS=Homo sapiens OX=9606 GN=ITIH1 PE=1 SV=3	0		40.157	13	8	8	86	8	911	101.3	6.79	263.21	8	0	1.428	40.86	502572	298137	28.21	9.48	High	High	High	High	High	High	1
0	High	Master Protein	Q14624	Inter-alpha-trypsin inhibitor heavy chain H4 OS=Homo sapiens OX=9606 GN=ITIH4 PE=1 SV=4	0		68.745	14	11	11	185	11	930	103.3	6.98	587.75	11	0	1.342	34.53	1.01178e+06	667022	17.28	13.36	High	High	High	High	High	High	1
0	High	Master Protein	P13671	Complement component C6 OS=Homo sapiens OX=9606 GN=C6 PE=1 SV=3	0		13.578	5	4	4	28	4	934	104.7	6.76	76.71	4	0	1.161	34.18	77219.6	66582.8	16.17	16.36	High	High	High	High	High	High	1
0	High	Master Protein	P19823	Inter-alpha-trypsin inhibitor heavy chain H2 OS=Homo sapiens OX=9606 GN=ITIH2 PE=1 SV=2	0		50.901	12	9	10	128	9	946	106.4	6.86	322.75	9	0	1.82	46.88	935956	409634	25.99	21.28	High	High	High	High	High	High	1
0	High	Master Protein	Q9BXW6	Oxysterol-binding protein-related protein 1 OS=Homo sapiens OX=9606 GN=OSBPL1A PE=1 SV=2	0.007		3.088	2	1	1	18	1	950	108.4	6.38	62.18	1	0	0.823	40.39	36961	37281.9	37.17	38.02	High	High	High	High	High	Not Found	1
0	High	Master Protein	Q02413	Desmoglein-1 OS=Homo sapiens OX=9606 GN=DSG1 PE=1 SV=2	0		45.804	10	8	10	96	8	1049	113.7	5.03	268.09	8	0	0.608	74.99	96895.2	218729	75.57	21.41	High	High	High	High	High	High	1
0	High	Master Protein	A5A3E0	POTE ankyrin domain family member F OS=Homo sapiens OX=9606 GN=POTEF PE=1 SV=2	0		6.4	2	2	2	5	2	1075	121.4	6.2	9.43	2	0	0.848	38.86	14243.2	18104.7	61.27	25.93	High	High	Peak Found	High	High	Peak Found	1
0	High	Master Protein	P00450	Ceruloplasmin OS=Homo sapiens OX=9606 GN=CP PE=1 SV=1	0		165.933	31	24	26	390	24	1065	122.1	5.72	1153.99	24	0	1.917	47.84	2.2675e+06	1.27602e+06	33.22	13.55	High	High	High	High	High	High	1
0	High	Master Protein	P08603	Complement factor H OS=Homo sapiens OX=9606 GN=CFH PE=1 SV=4	0		150.497	32	31	33	399	31	1231	139	6.61	1053.11	31	0	1.175	36.02	1.63355e+06	1.42319e+06	5.11	19.93	High	High	High	High	High	High	1
0	High	Master Protein	P01023	Alpha-2-macroglobulin OS=Homo sapiens OX=9606 GN=A2M PE=1 SV=3	0		345.73	49	51	56	1100	51	1474	163.2	6.46	3065.36	51	0	2.426	63.99	1.16899e+07	4.97988e+06	37.01	13.49	High	High	High	High	High	High	1
0	High	Master Protein	P01024	Complement C3 OS=Homo sapiens OX=9606 GN=C3 PE=1 SV=2	0		554.916	51	72	80	1670	72	1663	187	6.4	5482.05	72	0	1.876	48.36	1.63825e+07	8.04611e+06	25.15	18.81	High	High	High	High	High	High	1
0	High	Master Protein	P01031	Complement C5 OS=Homo sapiens OX=9606 GN=C5 PE=1 SV=4	0		24.305	7	7	8	39	7	1676	188.2	6.52	99.01	7	0	1.771	31.91	197084	92536.1	21.6	19.91	High	High	High	High	High	High	1
0	High	Master Protein	P0C0L5	Complement C4-B OS=Homo sapiens OX=9606 GN=C4B PE=1 SV=2	0		202.746	31	40	42	505	3	1744	192.6	7.27	1480.5	40	39	1.737	45.08	4.38951e+06	2.65921e+06	21.28	7.66	High	Peak Found	High	Peak Found	High	Peak Found	1
0	High	Master Protein	P0C0L4	Complement C4-A OS=Homo sapiens OX=9606 GN=C4A PE=1 SV=2	0		208.434	32	40	42	524	3	1744	192.7	7.08	1538.41	40	0	1.957	51.53	59006.5	26956	8.36	8.08	High	High	High	High	High	High	1
0	High	Master Protein	Q5D862	Filaggrin-2 OS=Homo sapiens OX=9606 GN=FLG2 PE=1 SV=1	0		27.103	6	6	6	38	6	2391	247.9	8.31	94.06	6	0	0.505	79.29	73116.5	190566	74.01	18.39	High	High	High	High	High	High	1
0	High	Master Protein	P02751	Fibronectin OS=Homo sapiens OX=9606 GN=FN1 PE=1 SV=5	0.004		3.565	1	1	1	1	1	2477	272.2	5.5	1.94	1	0	1.407	45.34	6726.1	4272.21	36.84	34.88	High	Peak Found	Peak Found	Peak Found	Peak Found	Peak Found	1
0	High	Master Protein	Q86YZ3	Hornerin OS=Homo sapiens OX=9606 GN=HRNR PE=1 SV=2	0		81.787	16	14	14	132	14	2850	282.2	10.04	331.73	14	0	0.648	90.82	514896	723190	72.16	46.81	High	High	High	High	High	High	1
0	High	Master Protein	P15924	Desmoplakin OS=Homo sapiens OX=9606 GN=DSP PE=1 SV=3	0		26.186	3	6	7	22	6	2871	331.6	6.81	68.36	6	0	0.462	92.47	52078.5	118547	87.4	31.79	Peak Found	High	Peak Found	High	High	High	1
0	High	Master Protein	P20930	Filaggrin OS=Homo sapiens OX=9606 GN=FLG PE=1 SV=3	0.003		3.146	0	1	1	6	1	4061	434.9	9.25	12.11	1	0	0.594	48.79	8134.43	13705	60.65	54.4	High	High	Peak Found	High	Peak Found	High	1
0	High	Master Protein	P04114	Apolipoprotein B-100 OS=Homo sapiens OX=9606 GN=APOB PE=1 SV=2	0		126.229	10	34	35	191	34	4563	515.3	7.05	506.35	34	0	1.796	55.82	688919	289991	28.49	25.77	High	High	High	High	High	High	1
